# Supplementary material for: Unintentional Recharge of Aquifers from Dams and Dykes in Spain. A GIS-Based Approach to Determine a Fractional Volume
Source: Preprints.org preprint supplement (doi:10.20944/preprints202306.1919.v2), 2023-06-28
Supplement: Supplementary file 1 [file graficas excel tablas.xlsx]

## Sheet: tipos
SV: vertical jump	12051
CV: crossing with road	9970
PP: step over a wall	4031
PE: pipe crossing	972
OM: mixed obstacle	382
XX: Not assigned	5
DE: Unknown*	4
Total*	27685
Not included but mentioned in the article

## Sheet: certidumbre
YES: medium or high degree of certainty	19453
NO: low or no degree of certainty	8227
Not assigned	5
Not included but mentioned in the article

## Sheet: demarcaciones
ES020: DUERO	4893
ES080: JÚCAR	3765
ES091: EBRO	3757
ES030: TAJO	3414
ES010: MIÑO-SIL	3342
ES050: GUADALQUIVIR	3273
ES016: CANTÁBRICO OCCIDENTAL	2398
ES040: GUADIANA	1261
ES070: SEGURA	801
ES017: CANTÁBRICO ORIENTAL	776
Not assigned*	5
Total	27685
Not included but mentioned in the article

## Sheet: fish pass
YES	2767
NO	14353
Deviations	10553
Unknown*	12
Not included but mentioned in the article

## Sheet: uses (2)
VC: road crossing	10317
DE: unknown	5463
RE: irrigation	3664
OT: other	3383
IN: industrial	1608
SD: not defined	1002
RG: regulation	447
EN: energy	288
TD: hydroelectric transfers and diversions	282
CH: water supply	230
DR: diversion	221
RC: recreation & navigation	173
GA: livestock	148
AM: environmental	131
CA: flood control	105
AF: flow gauging	91
AC: aquaculture	88
Other	39

## Sheet: uses
VC: road crossing	10317
DE: unknown	5463
RE: irrigation	3664
OT: other	3383
IN: industrial	1608
SD: not defined	1002
RG: regulation	447
EN: energy	288
TD: hydroelectric transfers and diversions	282
CH: water supply	230
DR: diversion	221
RC: recreation & navigation	173
GA: livestock	148
AM: environmental	131
CA: flood control	105
AF: flow gauging	91
AC: aquaculture	88
CP: slope correction	22
RA: aquifer recharge	9
RS: solid retention	8
Not assigned	5
Total	27685

## Sheet: datos altura
Full constructive information	4171
No constructive information	23514
Total	27685

## Sheet: Hoja1
Code	Description
CODMAS	code of the involved Surface Water Body
COD_COD	hydro-morphological section code
codMuni:	postal code of the municipality where the obstacle is located
OBST	transversal obstacle
NN	order number of the obstacle, according to its position in the Surface Water Body, from upstream to downstream
COORD_X AND COORD_Y	transverse structure’s X and Y coordinates (ETRS89).

## Sheet: Hoja3
Code	Description
H_TOTAL	Total height of the construction site, from crest to foundation.
H_SALTO	Height of the fall from the sheet of water to its crest. It may coincide with the total height of the obstacle, depending on the flow conditions.
PROF_POZA	Depth of the rise pool at the foot of the obstacle.
LONG_COR	Length of the infrastructure at crest.
ANCHO_COR	Width of infrastructure at crest.
H_AGUA_COR	Water depth on crest.
V_ AGUA	Water velocity at crest, inside pipe or canal, depending on obstacle.
H_ AGUA_TUB	Water draught in passage pipe.
PENDIENTE	Slope of the facing (%).
H_ AGUA _PAR	Water draught on facing.
DIST_COR	Distance from the foot of the construction site to the crown of the crest.
LONG_REM	Length of backwater created by the obstacle.
ANCH_REM	Width of the backwater created by the obstacle.
PROF_REM	Depth of backwater created by obstacle.
ANCHO_PREM	Average width of the channel before the backwater created by the obstacle.
PROF_PREM	Mean channel draught before the backwater created by the obstacle.
